# Supplementary material for: Microbial Cross-contamination in Multidose Eyedrops: The Impact of Instillation Angle and Bottle Geometry
Source: PubMed Central journal article supplement — Transl Vis Sci Technol. 2020 Jun 5;9(7):7. doi: 10.1167/tvst.9.7.7 (PMC7414607; doi:10.1167/tvst.9.7.7), 2020-06-05

**S1. Process of contamination of bottles, collection of the drops and culture.**

Contamination of the external surface of the nozzle of eye drops with *Pseudomonas aeruginosa* solution (A and B), inoculation on agar-chocolate plates (C) and incubation (D).

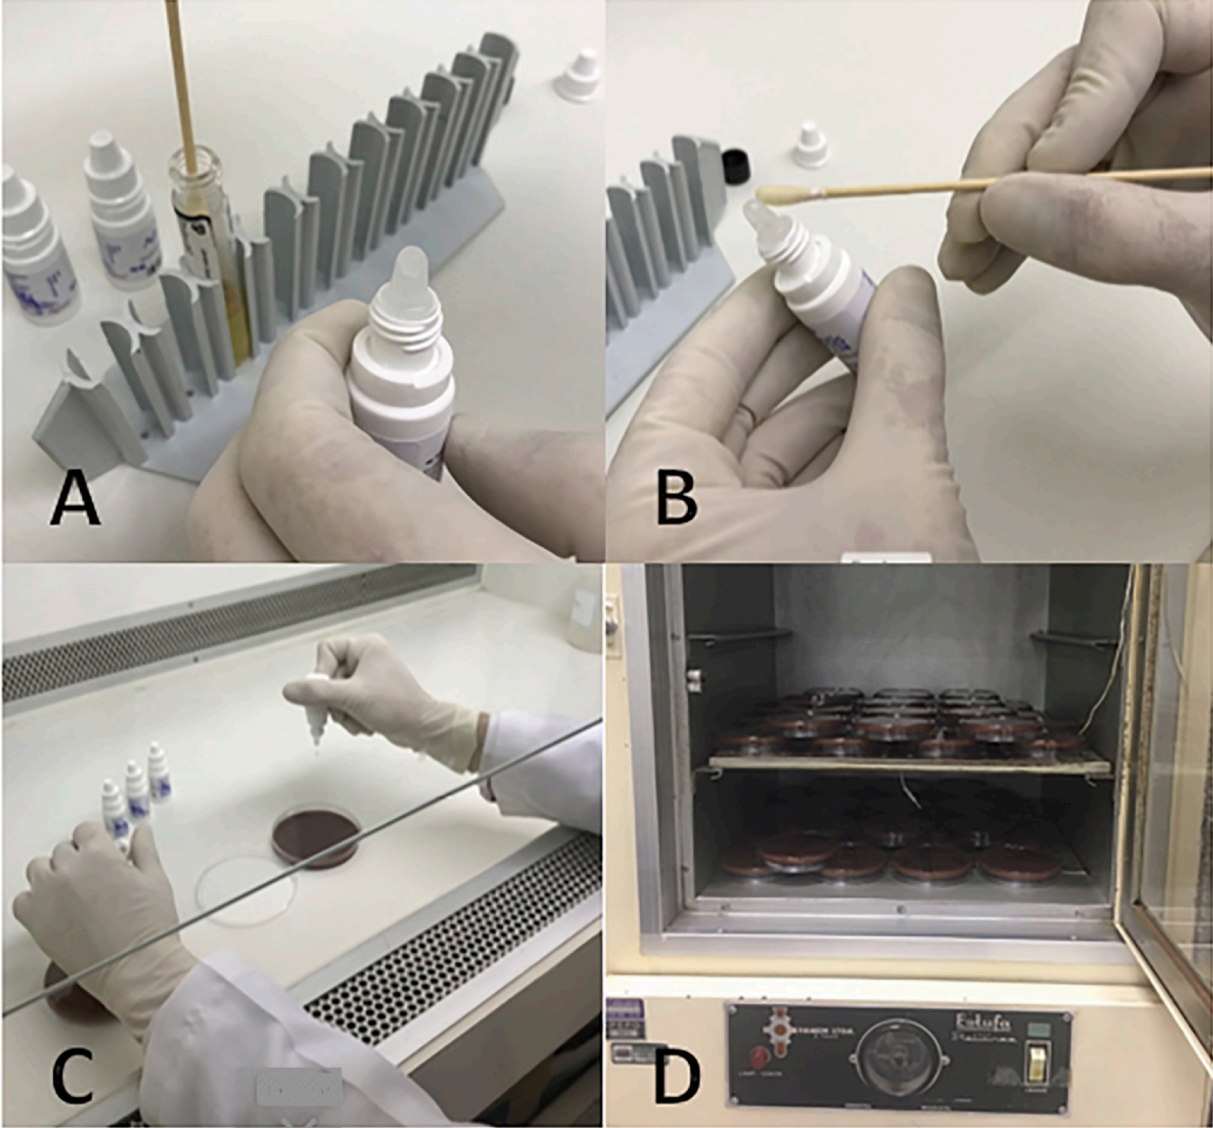

Supplement: tvst-9-7-7_s001.pdf [file tvst-9-7-7_s001.pdf]
