# Supplementary figures and images for: Microbial Cross-contamination in Multidose Eyedrops: The Impact of Instillation Angle and Bottle Geometry
Source: PubMed Central journal article supplement — Transl Vis Sci Technol. 2020 Jun 5;9(7):7. doi: 10.1167/tvst.9.7.7 (PMC7414607; doi:10.1167/tvst.9.7.7), 2020-06-05

**S2. Bacterial growth on agar-chocolate plate from contaminated eye drops**

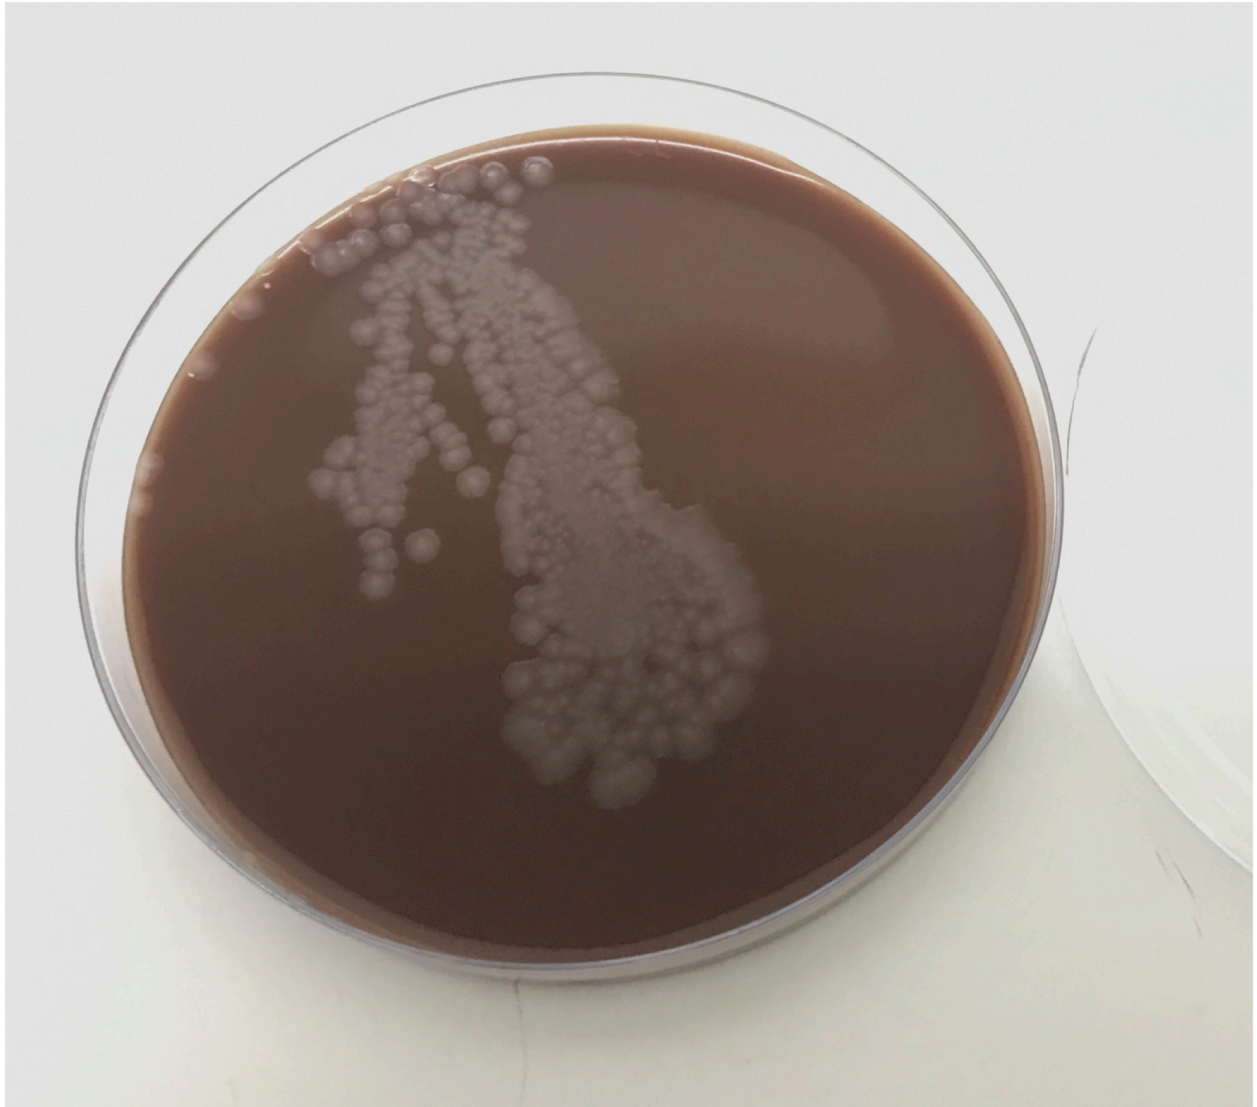

Supplement: tvst-9-7-7_s002.pdf [file tvst-9-7-7_s002.pdf]
